# Supplementary material
Source: ML conference proceedings conference paper supplement (https://aclanthology.org/D19-1264)
Supplement: Attachment [file D19-1264.Attachment.zip]

## A Appendices

To better demonstrate the effectiveness of the graph attention mechanism (GAT), and separate its function from LSTM, we performed ablation studies. We build a model called LSTMPath, which removes GAT from AttnPath, so the definition of state vector  $\mathbf{s}_{i,t}$  is shortened to  $[\mathbf{m}_{i,t}; \mathbf{h}_t]$ .

Table 6 shows the success rate (SR) of finding paths of several path-based methods. DeepPath NoPre means directly training DeepPath, without pretraining, i.e, showing several right paths to pre-train the model. This proves that the performance of DeepPath heavily relies on pretraining, while AttnPath model is capable of performing better without pretraining.

Table 7 shows fact prediction MAP of several compared methods. Results of TransE / H / R / D and DeepPath are cited from (Xiong et al., 2017). It proves that introducing GAT into the model is effective.

Table 8 shows link prediction MAP of several compared methods. Results of TransE / R, PRA, DeepPath are cited from (Xiong et al., 2017), while results of MINERVA are cited from (Das et al., 2018).

Table 9 shows link prediction hits@1 of several compared methods. Hits@1 means the proportion of  $(h, r)$  pair where the algorithm ranks the ground truth tail entity to the first place. Results of MINERVA are cited from (Das et al., 2018).

Table 6: Ablation study: SR of finding paths of several path-based methods.

| Method           |                  | FB15K-237 |             | NELL-995 |             |
|------------------|------------------|-----------|-------------|----------|-------------|
| DeepPath         |                  | 17.7      |             | 31.8     |             |
| DeepPath TransD  |                  | 18.2      |             | 32.7     |             |
| DeepPath NoPre   |                  | 7.3       |             | 27.8     |             |
| LSTMPath         | AttnPath         | 14.7      | 15.7        | 33.9     | 37.3        |
| LSTMPath MS / RR | AttnPath MS / RR | 17.4      | 18.1        | 35.9     | 40.4        |
| LSTMPath Force   | AttnPath Force   | 29.0      | <b>30.4</b> | 46.7     | <b>48.1</b> |

Table 7: Ablation study: fact prediction MAP of several compared methods.

| Methods          |                  | FB15K-237 |             | NELL-995 |             |
|------------------|------------------|-----------|-------------|----------|-------------|
| TransE           |                  | 27.7      |             | 38.3     |             |
| TransH           |                  | 30.9      |             | 38.9     |             |
| TransR           |                  | 30.2      |             | 40.6     |             |
| TransD           |                  | 30.3      |             | 41.3     |             |
| PRA              |                  | 30.8      |             | 57.5     |             |
| DeepPath         |                  | 31.1      |             | 49.3     |             |
| DeepPath TransD  |                  | 31.3      |             | 53.5     |             |
| DeepPath NoPre   |                  | 23.0      |             | 52.1     |             |
| LSTMPath         | AttnPath         | 31.0      | 31.5        | 57.5     | 59.8        |
| LSTMPath MS / RR | AttnPath MS / RR | 34.4      | 34.6        | 63.4     | 65.4        |
| LSTMPath Force   | AttnPath Force   | 36.0      | <b>37.9</b> | 68.6     | <b>69.3</b> |

Table 8: Ablation study: link prediction MAP of several compared methods.

| Method           |                  | FB15K-237 |             | NELL-995 |             |
|------------------|------------------|-----------|-------------|----------|-------------|
| TransE           |                  | 53.2      |             | 73.7     |             |
| TransH           |                  | 36.0      |             | 79.7     |             |
| TransR           |                  | 54.0      |             | 78.9     |             |
| TransD           |                  | 63.7      |             | 81.5     |             |
| PRA              |                  | 54.1      |             | 67.5     |             |
| MINERVA          |                  | 29.3      |             | 72.5     |             |
| DeepPath         |                  | 57.2      |             | 79.6     |             |
| DeepPath TransD  |                  | 63.5      |             | 82.6     |             |
| DeepPath NoPre   |                  | 53.9      |             | 79.6     |             |
| LSTMPath         | AttnPath         | 58.1      | 58.5        | 81.2     | 81.4        |
| LSTMPath MS / RR | AttnPath MS / RR | 61.9      | 62.3        | 82.8     | 83.0        |
| LSTMPath Force   | AttnPath Force   | 65.4      | <b>66.1</b> | 85.5     | <b>85.8</b> |

Table 9: Ablation study: link prediction hits@1 of several compared methods.

| Method           |                  | FB15K-237 |             | NELL-995 |             |
|------------------|------------------|-----------|-------------|----------|-------------|
| TransE           |                  | 49.2      |             | 66.0     |             |
| TransH           |                  | 21.3      |             | 70.0     |             |
| TransR           |                  | 40.3      |             | 68.1     |             |
| TransD           |                  | 46.2      |             | 71.9     |             |
| PRA              |                  | 46.1      |             | 74.2     |             |
| MINERVA          |                  | 21.7      |             | 66.3     |             |
| DeepPath         |                  | 46.0      |             | 71.0     |             |
| DeepPath TransD  |                  | 47.9      |             | 72.4     |             |
| DeepPath NoPre   |                  | 37.5      |             | 71.1     |             |
| LSTMPath         | AttnPath         | 46.9      | 47.3        | 72.9     | 73.3        |
| LSTMPath MS / RR | AttnPath MS / RR | 48.1      | 48.2        | 75.9     | 76.2        |
| LSTMPath Force   | AttnPath Force   | 51.4      | <b>52.1</b> | 79.7     | <b>80.3</b> |
